# Supplementary material
Source: ML conference proceedings conference paper supplement (https://proceedings.mlr.press/v164/wang22f.html)
Supplement: Supplementary file 1 [file wang22f-supp.zip]

Archive with 2 entries (2 files):
- sili_appendix.pdf
- __MACOSX/._sili_appendix.pdf
